# Supplementary material
Source: PubMed Central journal article supplement (PMC8980920)
Supplement: jamainternmed-e220200-s001.pdf [file jamainternmed-e220200-s001.pdf]

## Supplementary Online Content

Barnett ML, Gaye M, Jena AB, Mehrotra A. Association of county-level prescriptions for hydroxychloroquine and ivermectin with county-level political voting patterns in the 2020 US presidential election. *JAMA Intern Med*. Published online February 18, 2022.  
doi:jamainternmed.2022.0200

**eTable.** Timeline of Selected Key Events for Hydroxychloroquine and Ivermectin in 2020

**eReferences.**

This supplementary material has been provided by the authors to give readers additional information about their work.

**eTable.** Timeline of Selected Key Events for Hydroxychloroquine and Ivermectin in 2020

|                                  | <b>Description</b>                                                                                                | <b>Reference</b> |
|----------------------------------|-------------------------------------------------------------------------------------------------------------------|------------------|
| <i>Hydroxychloroquine Events</i> |                                                                                                                   |                  |
| March 28, 2020                   | Food and Drug Administration (FDA) issues an Emergency Use Authorization (EUA) for hydroxychloroquine             | (1)              |
| June 15, 2020                    | FDA revokes the March 28, 2020 EUA for hydroxychloroquine                                                         | (2)              |
| <i>Ivermectin Events</i>         |                                                                                                                   |                  |
| April 3, 2020                    | In vitro study claiming potential antiviral effect of ivermectin published                                        | (3)              |
| August 1, 2020                   | NIH COVID-19 treatment guidelines explicitly recommend against ivermectin use                                     | (4)              |
| November 13, 2020                | Widely cited clinical trial pre-print (subsequently retracted) claims 90% efficacy of ivermectin against COVID-19 | (5)              |
| December 8, 2020                 | Senate Testimony to Homeland Security Committee by Dr. Pierre Kory promoting the use of ivermectin for COVID-19   | (6)              |

## eReferences.

1. Letter to Dr Rick Bright re: request for Emergency Use Authorization for use of chloroquine phosphate or hydroxychloroquine sulfate supplied from the strategic national stockpile for treatment of 2019 coronavirus disease [Internet]. [cited 2022 Jan 20]. Available from: <https://www.fda.gov/media/136534/download>
2. Commissioner O of the. Coronavirus (COVID-19) Update: FDA Revokes Emergency Use Authorization for Chloroquine and Hydroxychloroquine [Internet]. FDA. FDA; 2020 [cited 2022 Jan 20]. Available from: <https://www.fda.gov/news-events/press-announcements/coronavirus-covid-19-update-fda-revokes-emergency-use-authorization-chloroquine-and>
3. Caly L, Druce JD, Catton MG, Jans DA, Wagstaff KM. The FDA-approved drug ivermectin inhibits the replication of SARS-CoV-2 in vitro. *Antiviral Res.* 2020 Jun 1;178:104787.
4. Ivermectin [Internet]. COVID-19 Treatment Guidelines. [cited 2021 Sep 10]. Available from: <https://www.covid19treatmentguidelines.nih.gov/therapies/antiviral-therapy/ivermectin/>
5. Efficacy and Safety of Ivermectin for Treatment and prophylaxis of COVID-19 Pandemic [Internet]. 2022 [cited 2022 Jan 20]. Available from: <https://www.researchsquare.com/article/rs-100956/v4>
6. Kory P. Homeland Security Committee Meeting: Focus on Early Treatment of COVID-19 [Internet]. Sect. Homeland Security Committee Washington, DC; Available from: <https://www.hsgac.senate.gov/imo/media/doc/Testimony-Kory-2020-12-08.pdf>
